# Supplementary material for: Oxidative stress enhances the expression of IL-33 in human airway epithelial cells
Source: Springer Nature journal article supplement (doi:10.1186/s12931-018-0752-9), 2018-03-27

**Oxidative stress enhances the expression of IL-33 in human airway epithelial cells**

Hiroyuki Aizawa, M.D.<sup>1</sup>, Akira Koarai, M.D., Ph.D.<sup>1</sup>, Yutaka Shishikura, M.D., Ph.D.<sup>1</sup>,  
Satoru Yanagisawa, M.D., Ph.D.<sup>1</sup>, Mutsuo Yamaya, M.D., Ph.D.<sup>2</sup>, Hisatoshi Sugiura,  
M.D., Ph.D.<sup>1</sup>, Tadahisa Numakura, M.D., Ph.D.<sup>1</sup>, Mitsuhiro Yamada, M.D., Ph.D.<sup>1</sup>,  
Tomohiro Ichikawa M.D., Ph.D.<sup>1</sup>, Naoya Fujino M.D., Ph.D.<sup>1</sup>, Masafumi Noda M.D.,  
Ph.D.<sup>3</sup>, Yoshinori Okada, M.D., Ph.D.<sup>3</sup> and Masakazu Ichinose, M.D., Ph.D.<sup>1</sup>

<sup>1</sup> Department of Respiratory Medicine, Tohoku University Graduate School of  
Medicine, 1-1 Seiryō-machi, Aoba-ku, Sendai 980-8574, Japan.

<sup>2</sup> Department of Advanced Preventive Medicine for Infectious Disease, Tohoku  
University Graduate School of Medicine, 1-1 Seiryō-machi, Aoba-ku, Sendai 980-8575,  
Japan.

<sup>3</sup> Department of Thoracic Surgery, Institute of Development, Aging and Cancer, Tohoku  
University, 4-1 Seiryō-machi, Aoba-ku, Sendai 980-8575, Japan.

**Additional file**

## Figure legends

**Figure S1. Effect of mitogen-activated protein kinase (MAPK) inhibitors in H<sub>2</sub>O<sub>2</sub>-potentiated phosphorylation of MAPK (p38, JNK, ERK1/2).** The phosphorylation of p38, JNK and ERK was evaluated with immunoblotting in NCI-H292 cells. Pretreatment with MAPK inhibitor, p38 MAPK inhibitor (SB203580), JNK inhibitor (SP600125) or ERK1/2 inhibitor (U0126) inhibited the phosphorylation of p38-MAPK (A), JNK (B) and ERK1/2 (C) respectively. The data are representative of three independent experiments.

**Figure S2. Effect of NF- $\kappa$ B inhibitors in H<sub>2</sub>O<sub>2</sub>-potentiated IL-33 expression.** (A, B) IKK-2 inhibitor (SC-514) or I $\kappa$ B $\alpha$  inhibitor (BAY11-7085) was added 1 h before H<sub>2</sub>O<sub>2</sub> treatment of NCI-H292 cells. After 4 h, whole cells were harvested and assayed for the IL-33 gene expression by real-time Polymerase Chain Reaction (PCR). Values are the mean  $\pm$  SEM (n = 3). \*\*\*p < 0.001 compared with the values of vehicle-treated cells.

Figure S1

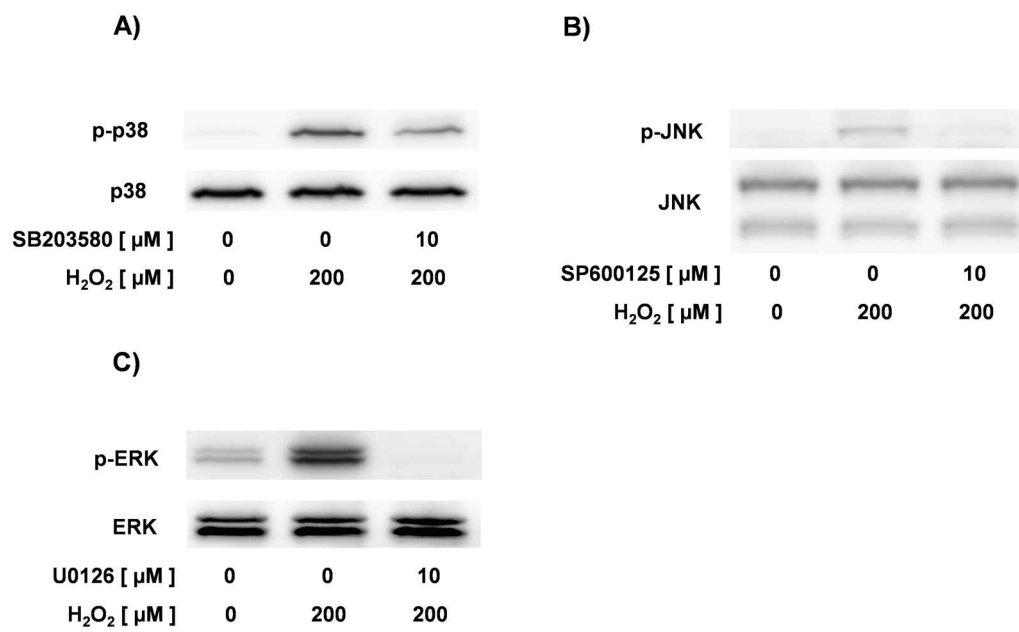

Figure S2

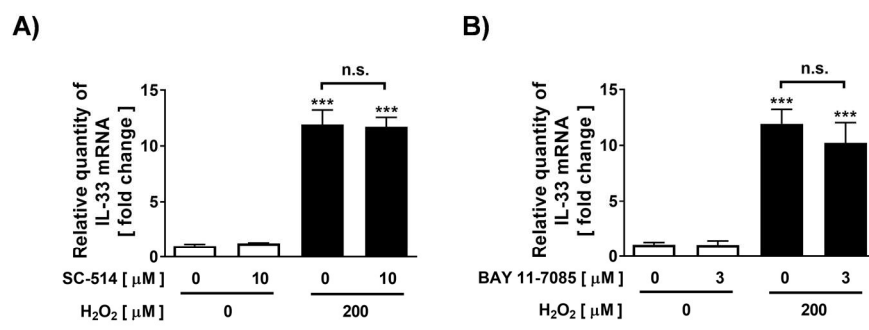

Supplement: MOESM1 [file 15571448]
